# Supplementary material for: Hericium erinaceus potentially rescues behavioural motor deficits through ERK-CREB-PSD95 neuroprotective mechanisms in rat model of 3-acetylpyridine-induced cerebellar ataxia
Source: PubMed Central journal article supplement (PMC7483741; doi:10.1038/s41598-020-71966-z), 2020-09-10
Supplement: 41598_2020_71966_MOESM1_ESM.pdf [file 41598_2020_71966_MOESM1_ESM.pdf]

***Hericium erinaceus* potentially rescues behavioural motor deficits through ERK-CREB-PSD95 neuroprotective mechanisms in rat model of 3-acetylpyridine-induced cerebellar ataxia**

<sup>1</sup>Pit Shan CHONG, <sup>1</sup># Sharafuddin KHAIRUDDIN, <sup>1</sup>Anna Chung Kwan TSE, <sup>1</sup>Lih Fhung HIEW, <sup>1</sup>Chun Lok LAU, <sup>1</sup>George Lim TIPOE, <sup>1</sup>Man-Lung FUNG, <sup>1,2</sup>Kah Hui WONG, <sup>1</sup>Lee Wei LIM

**Supplementary information**

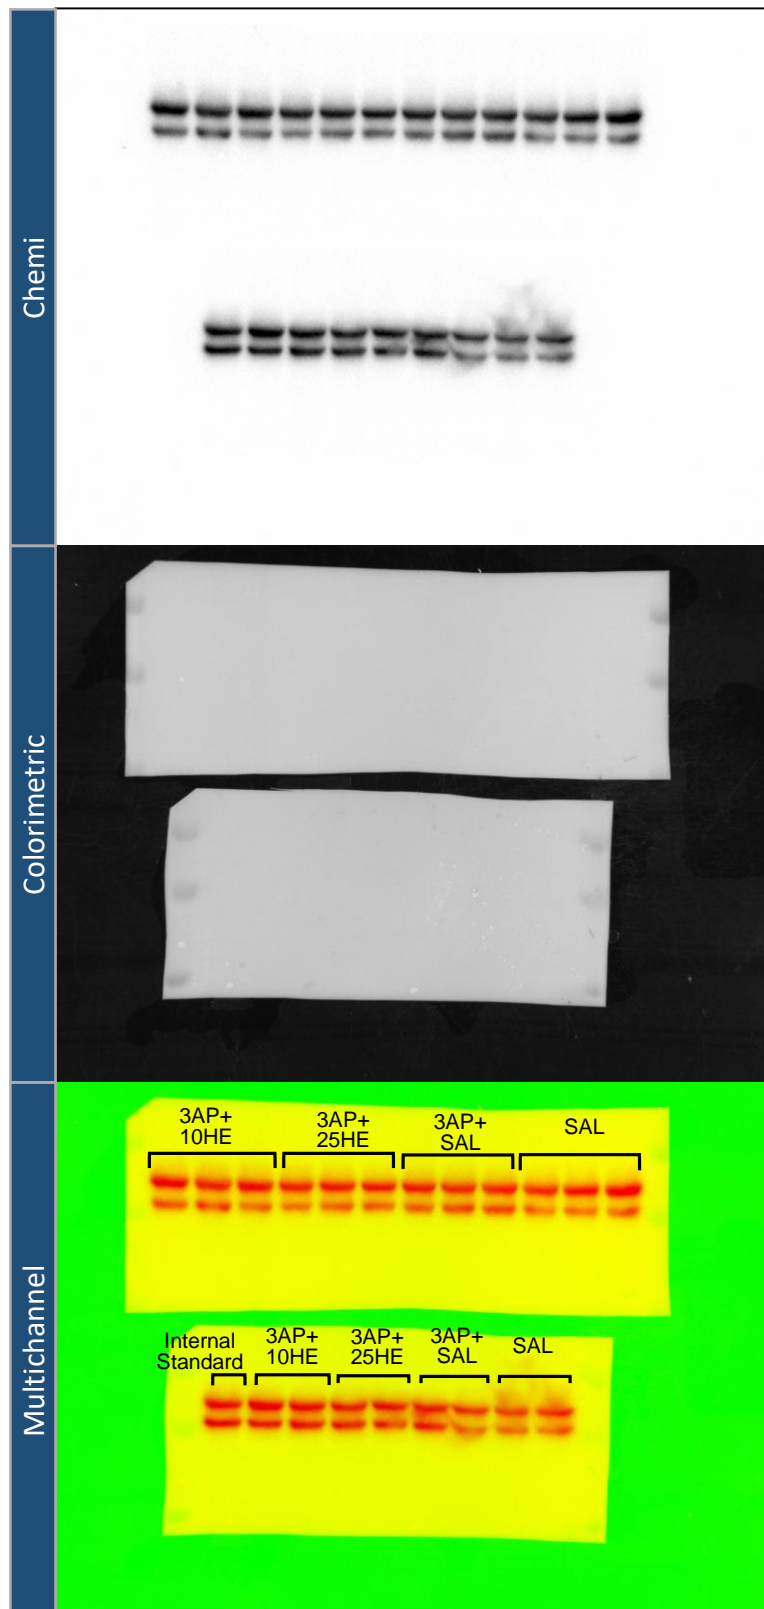

**Figure S1:** Western blot analysis of ERK1/2. Two blots were exposed and captured in one image. The lower blot is used as a representative figure in the manuscript without including the internal standard.

***Hericium erinaceus* potentially rescues behavioural motor deficits through ERK-CREB-PSD95 neuroprotective mechanisms in rat model of 3-acetylpyridine-induced cerebellar ataxia**

<sup>1</sup>#Pit Shan CHONG, <sup>1</sup># Sharafuddin KHAIRUDDIN, <sup>1</sup>Anna Chung Kwan TSE, <sup>1</sup>Lih Fhung HIEW, <sup>1</sup>Chun Lok LAU, <sup>1</sup>George Lim TIPOE, <sup>1</sup>Man-Lung FUNG, <sup>1,2</sup>Kah Hui WONG, <sup>1</sup>Lee Wei LIM

**Supplementary information**

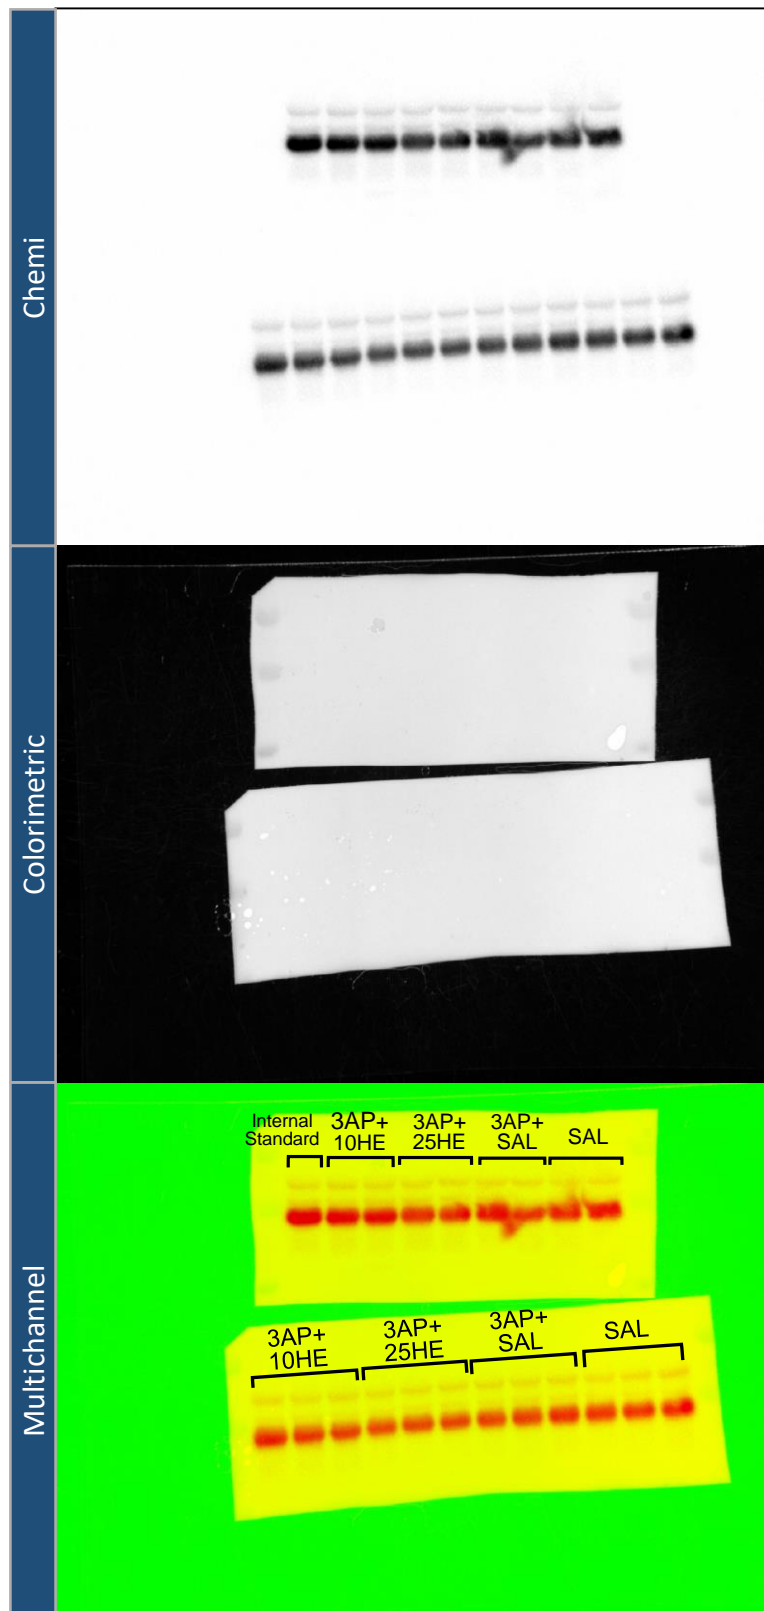

**Figure S2:** Western blot of GAPDH as a loading control for ERK1/2. The upper blot is used as a representative figure in the manuscript without including the internal standard.

***Hericium erinaceus* potentially rescues behavioural motor deficits through ERK-CREB-PSD95 neuroprotective mechanisms in rat model of 3-acetylpyridine-induced cerebellar ataxia**

<sup>1</sup>#Pit Shan CHONG, <sup>1</sup># Sharafuddin KHAIRUDDIN, <sup>1</sup> Anna Chung Kwan TSE, <sup>1</sup> Lih Fhung HIEW, <sup>1</sup> Chun Lok LAU, <sup>1</sup> George Lim TIPOE, <sup>1</sup> Man-Lung FUNG, <sup>1,2</sup> Kah Hui WONG, <sup>1</sup> Lee Wei LIM

**Supplementary information**

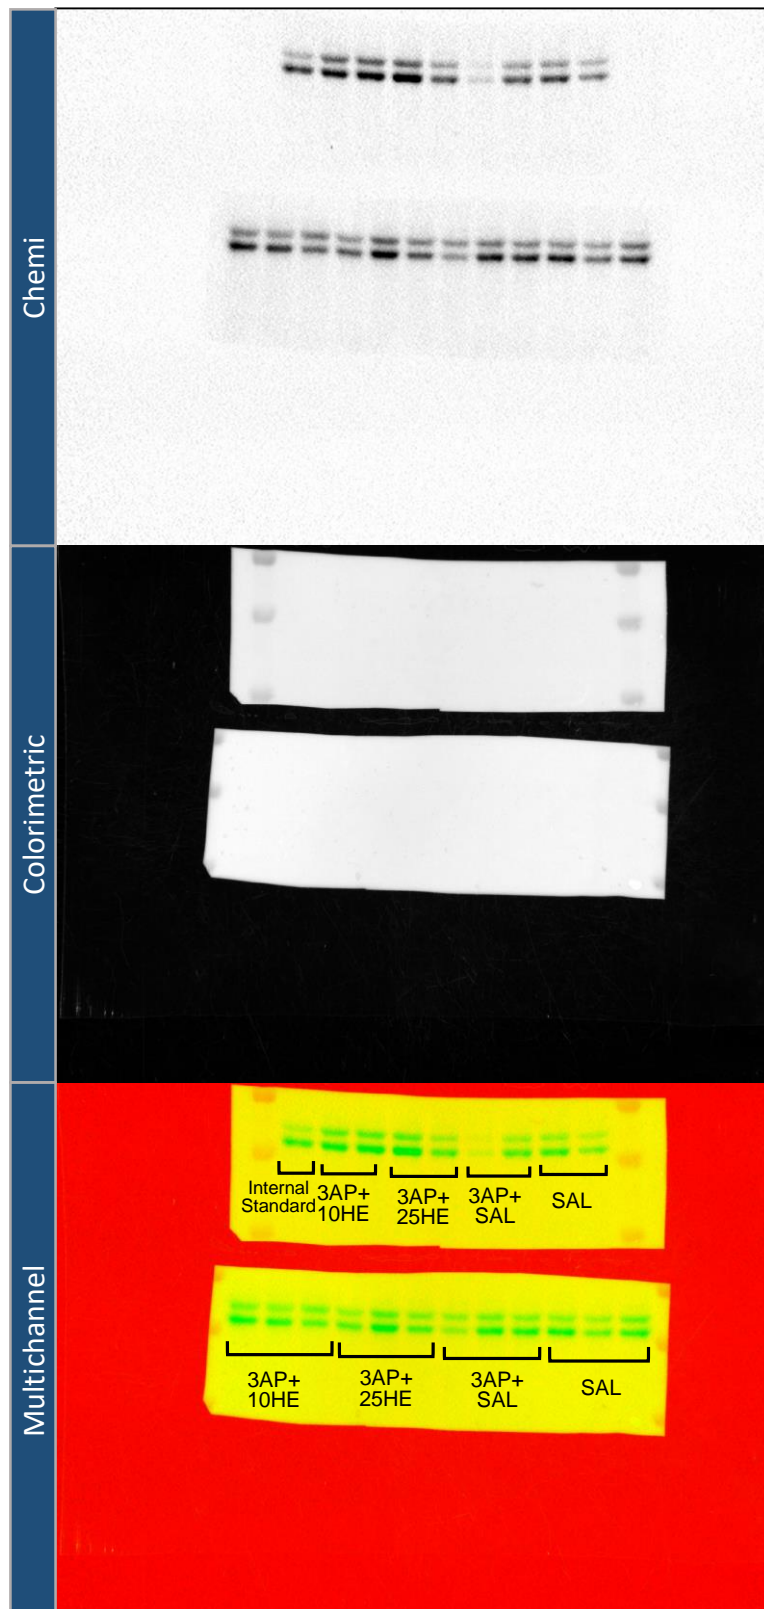

**Figure S3:** Western blot analysis of pERK1/2. Two blots were exposed and captured in one image. The upper blot is used as a representative figure in the manuscript without including the internal standard.

***Hericium erinaceus* potentially rescues behavioural motor deficits through ERK-CREB-PSD95 neuroprotective mechanisms in rat model of 3-acetylpyridine-induced cerebellar ataxia**

<sup>1</sup>#Pit Shan CHONG, <sup>1</sup># Sharafuddin KHAIRUDDIN, <sup>1</sup> Anna Chung Kwan TSE, <sup>1</sup> Lih Fhung HIEW, <sup>1</sup> Chun Lok LAU, <sup>1</sup> George Lim TIPOE, <sup>1</sup> Man-Lung FUNG, <sup>1,2</sup> Kah Hui WONG, <sup>1</sup> Lee Wei LIM

**Supplementary information**

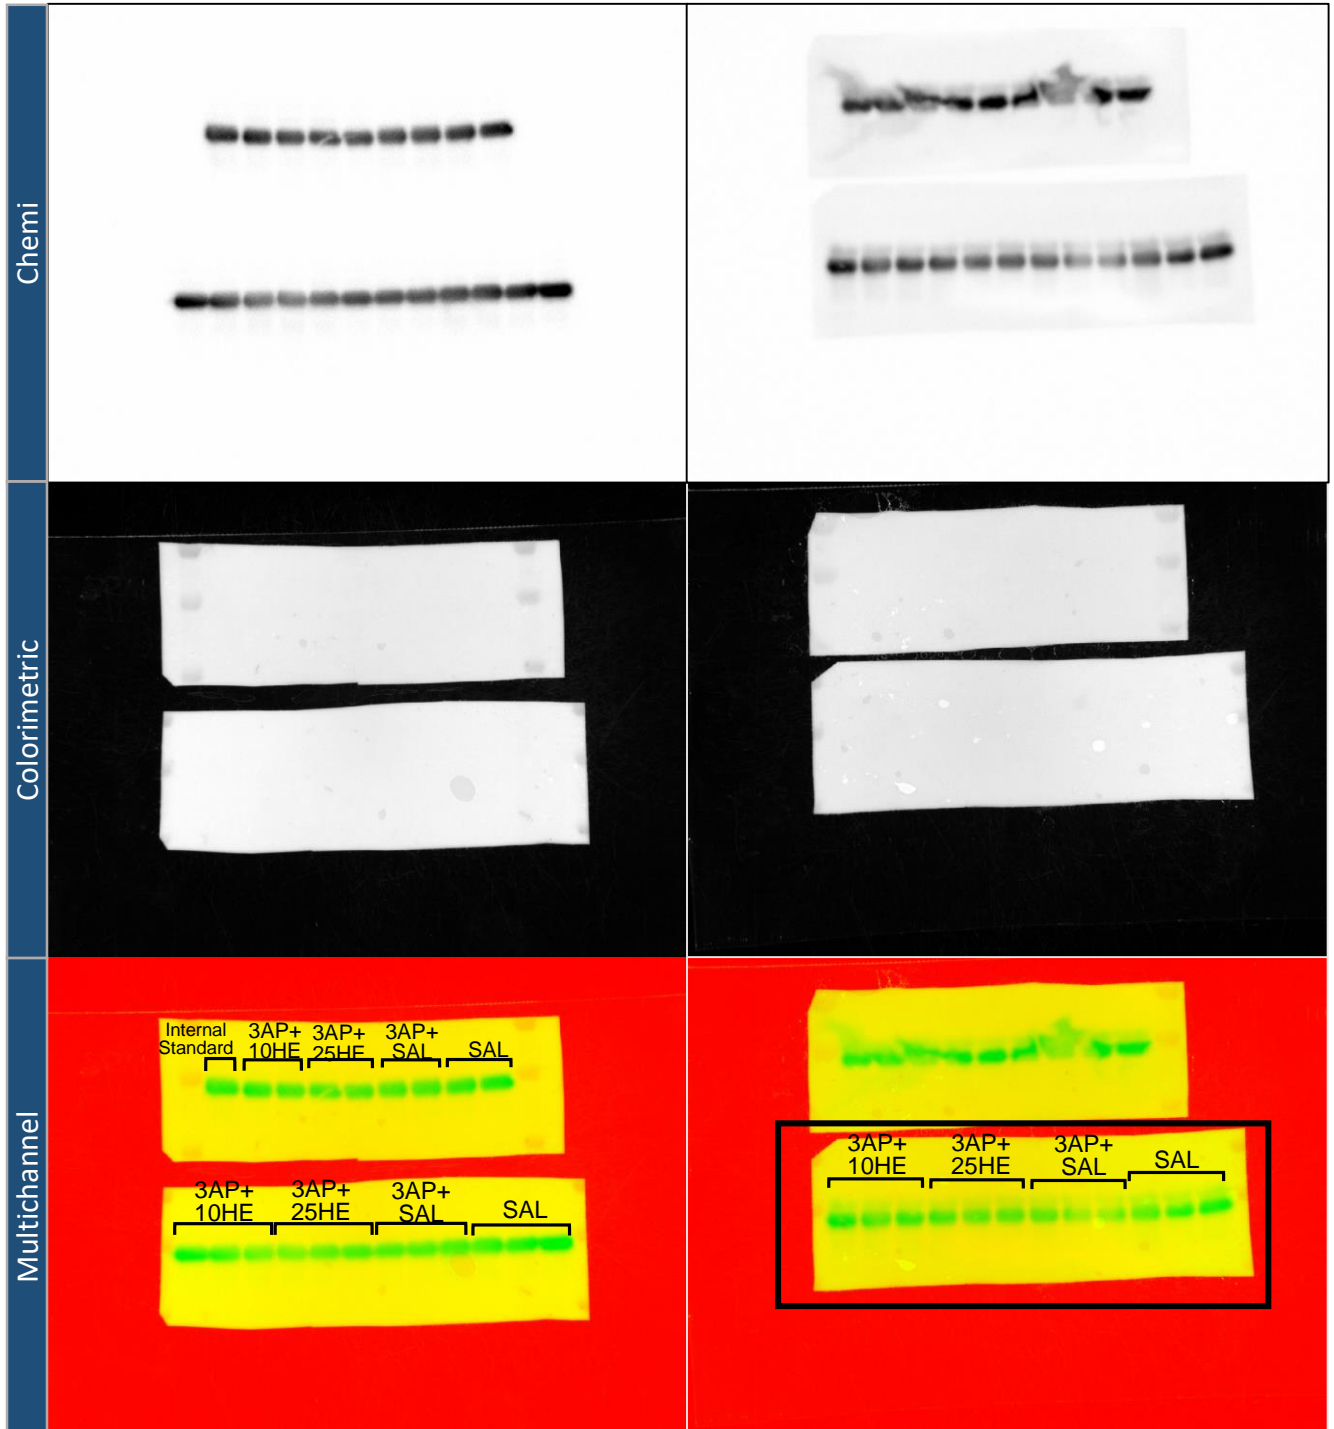

**Figure S4 : Western blot of GAPDH as a loading control for pERK1/2, SYP (Gel 1) and PSD-95 (left). Two blots were exposed and captured in one image. The upper blot is used as a representative figure in the manuscript without including the internal standard. Western Blot of GAPDH as a loading control for SYP (Gel 2) (right).**

***Hericium erinaceus* potentially rescues behavioural motor deficits through ERK-CREB-PSD95 neuroprotective mechanisms in rat model of 3-acetylpyridine-induced cerebellar ataxia**

<sup>1</sup>Pit Shan CHONG, <sup>1</sup># Sharafuddin KHAIRUDDIN, <sup>1</sup>Anna Chung Kwan TSE, <sup>1</sup>Lih Fhung HIEW, <sup>1</sup>Chun Lok LAU, <sup>1</sup>George Lim TIPOE, <sup>1</sup>Man-Lung FUNG, <sup>1,2</sup>Kah Hui WONG, <sup>1</sup>Lee Wei LIM

**Supplementary information**

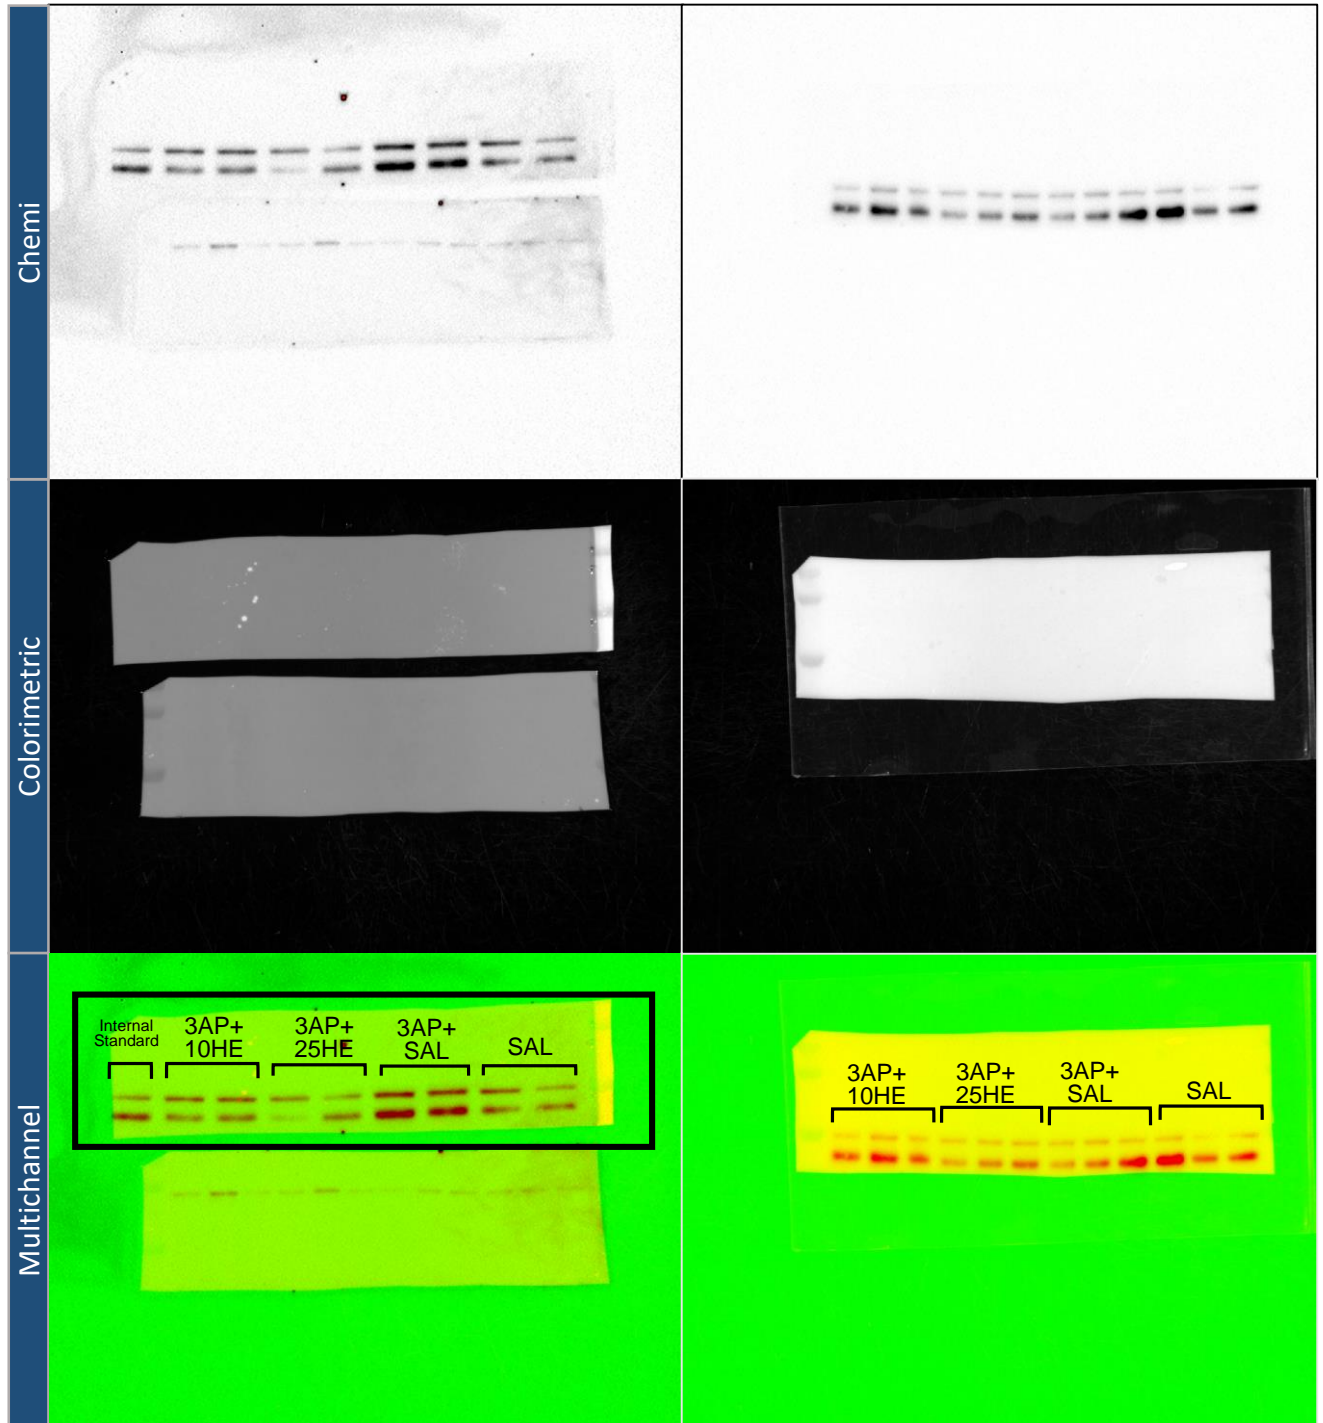

**Figure S5:** Western blot analysis of CREB. The upper left blot is used as a representative figure in the manuscript without including the internal standard.



***Hericium erinaceus* potentially rescues behavioural motor deficits through ERK-CREB-PSD95 neuroprotective mechanisms in rat model of 3-acetylpyridine-induced cerebellar ataxia**

<sup>1</sup>Pit Shan CHONG, <sup>1</sup>Sharafuddin KHAIRUDDIN, <sup>1</sup>Anna Chung Kwan TSE, <sup>1</sup>Lih Fhung HIEW, <sup>1</sup>Chun Lok LAU, <sup>1</sup>George Lim TIPOE, <sup>1</sup>Man-Lung FUNG, <sup>1,2</sup>Kah Hui WONG, <sup>1</sup>Lee Wei LIM

**Supplementary information**

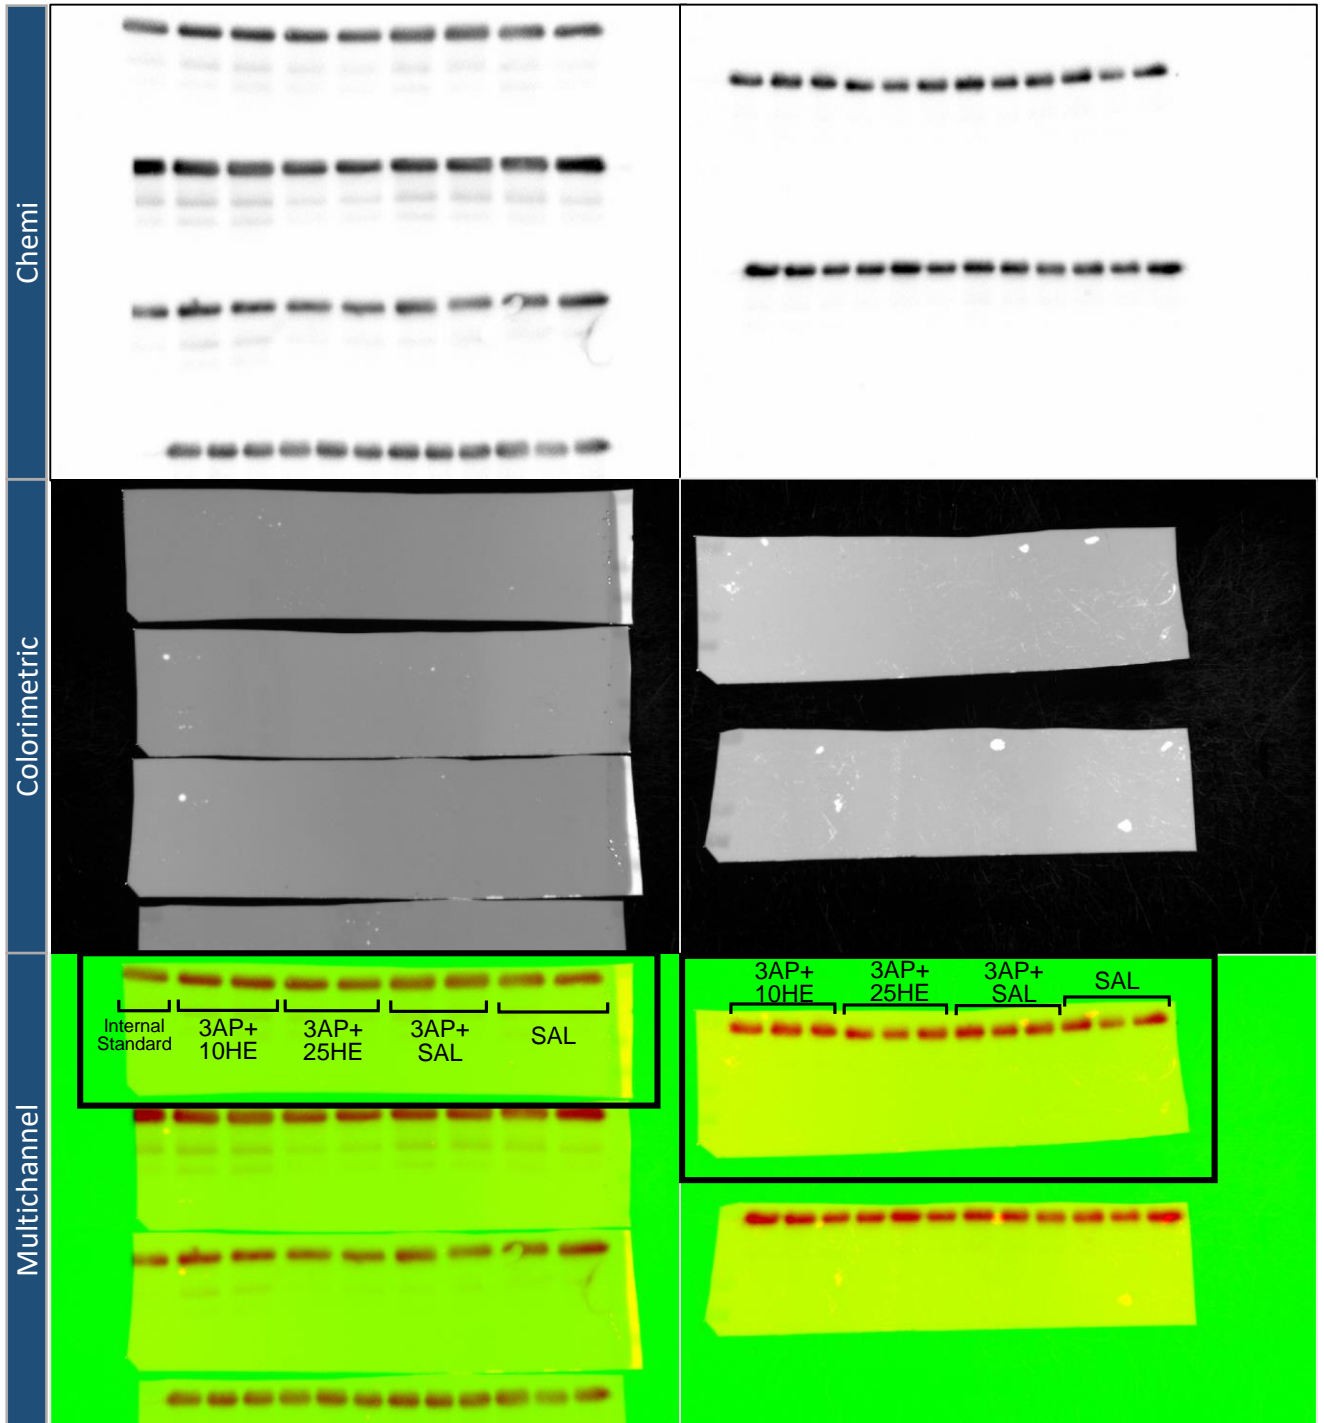

**Figure S6 :** Western blot of GAPDH as a loading control for CREB. More than one membrane were exposed at the same time while the blots of GAPDH were labelled. The top left blot is used as a representative figure in the manuscript without including the internal standard.

***Hericium erinaceus* potentially rescues behavioural motor deficits through ERK-CREB-PSD95 neuroprotective mechanisms in rat model of 3-acetylpyridine-induced cerebellar ataxia**

<sup>1</sup>Pit Shan CHONG, <sup>1</sup># Sharafuddin KHAIRUDDIN, <sup>1</sup>Anna Chung Kwan TSE, <sup>1</sup>Lih Fhung HIEW, <sup>1</sup>Chun Lok LAU, <sup>1</sup>George Lim TIPOE, <sup>1</sup>Man-Lung FUNG, <sup>1,2</sup>Kah Hui WONG, <sup>1</sup>Lee Wei LIM

**Supplementary information**

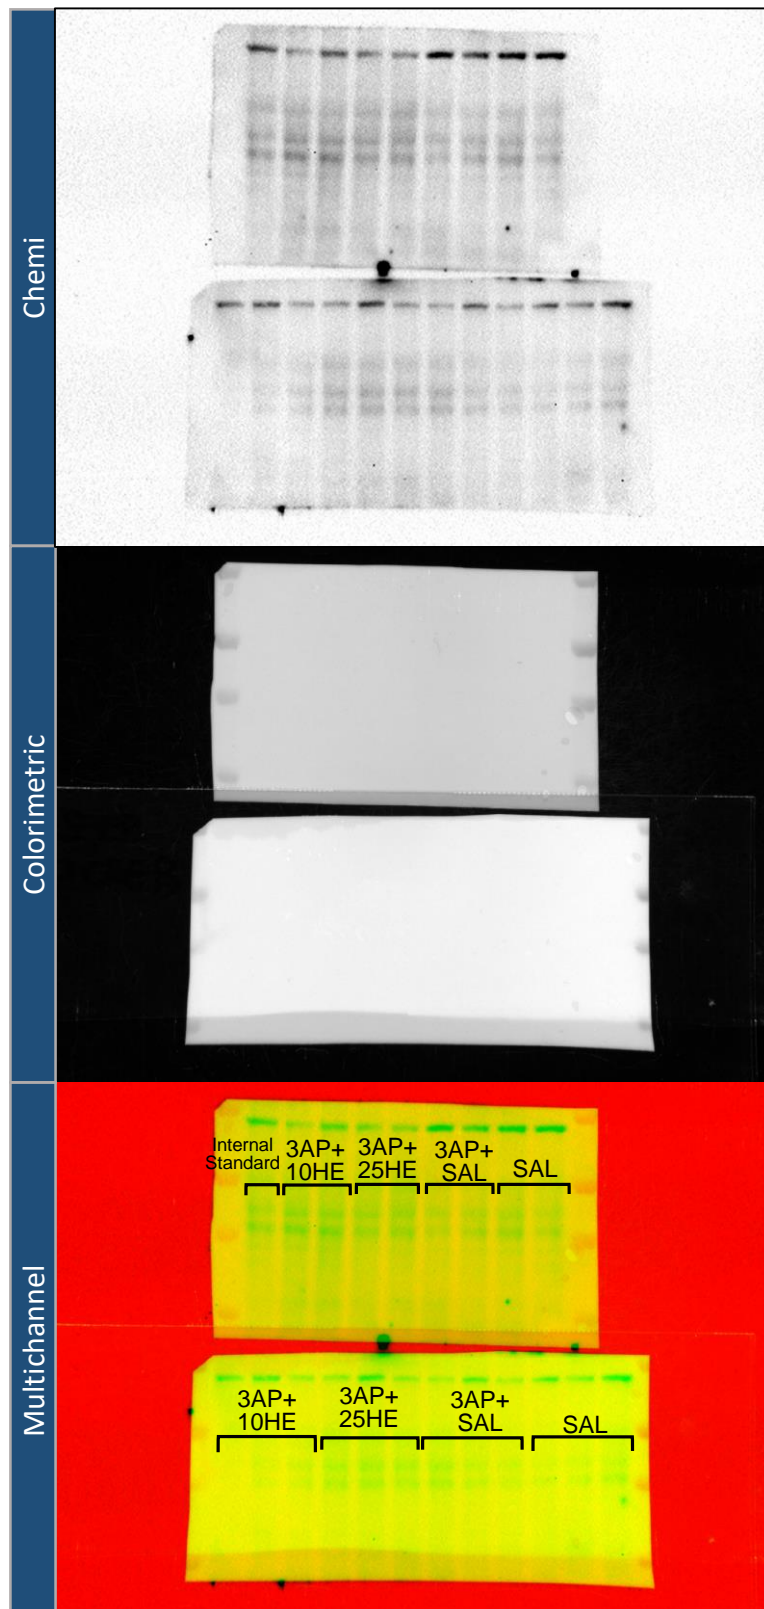

**Figure S7:** Western blot analysis of pCREB. Two blots were exposed and captured in one image. The upper blot is used as a representative figure in the manuscript without including the internal standard.

***Hericium erinaceus* potentially rescues behavioural motor deficits through ERK-CREB-PSD95 neuroprotective mechanisms in rat model of 3-acetylpyridine-induced cerebellar ataxia**

<sup>1</sup>#Pit Shan CHONG, <sup>1</sup># Sharafuddin KHAIRUDDIN, <sup>1</sup> Anna Chung Kwan TSE, <sup>1</sup> Lih Fhung HIEW, <sup>1</sup> Chun Lok LAU, <sup>1</sup> George Lim TIPOE, <sup>1</sup> Man-Lung FUNG, <sup>1,2</sup> Kah Hui WONG, <sup>1</sup> Lee Wei LIM

**Supplementary information**

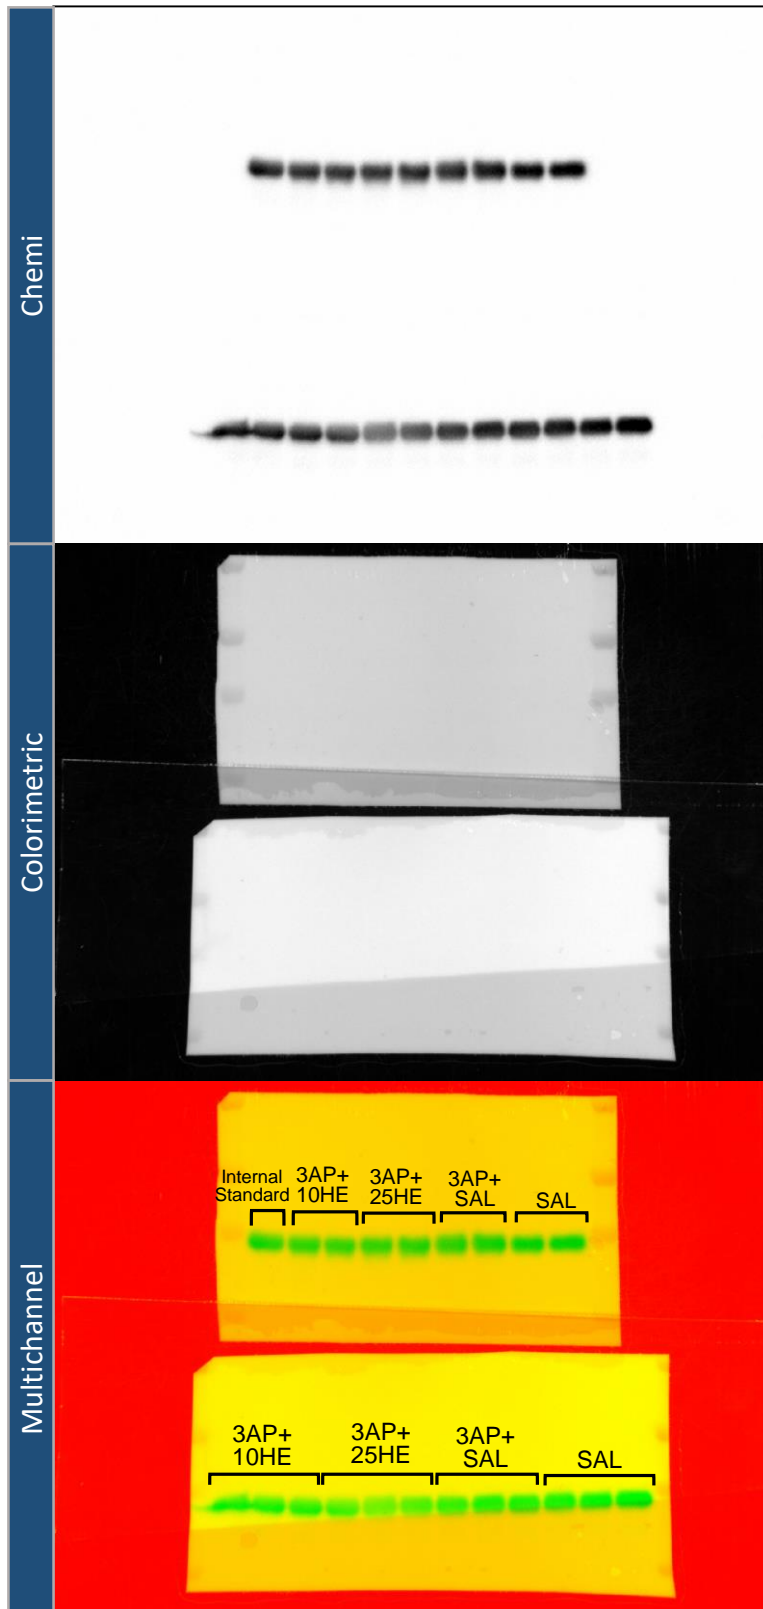

**Figure S8** : Western blot of GAPDH as a loading control for pCREB. . Two blots were exposed and captured in one image. The upper blot is used as a representative figure in the manuscript without including the internal standard.



***Hericium erinaceus* potentially rescues behavioural motor deficits through ERK-CREB-PSD95 neuroprotective mechanisms in rat model of 3-acetylpyridine-induced cerebellar ataxia**

<sup>1</sup>Pit Shan CHONG, <sup>1</sup># Sharafuddin KHAIRUDDIN, <sup>1</sup>Anna Chung Kwan TSE, <sup>1</sup>Lih Fhung HIEW, <sup>1</sup>Chun Lok LAU, <sup>1</sup>George Lim TIPOE, <sup>1</sup>Man-Lung FUNG, <sup>1,2</sup>Kah Hui WONG, <sup>1</sup>Lee Wei LIM

**Supplementary information**

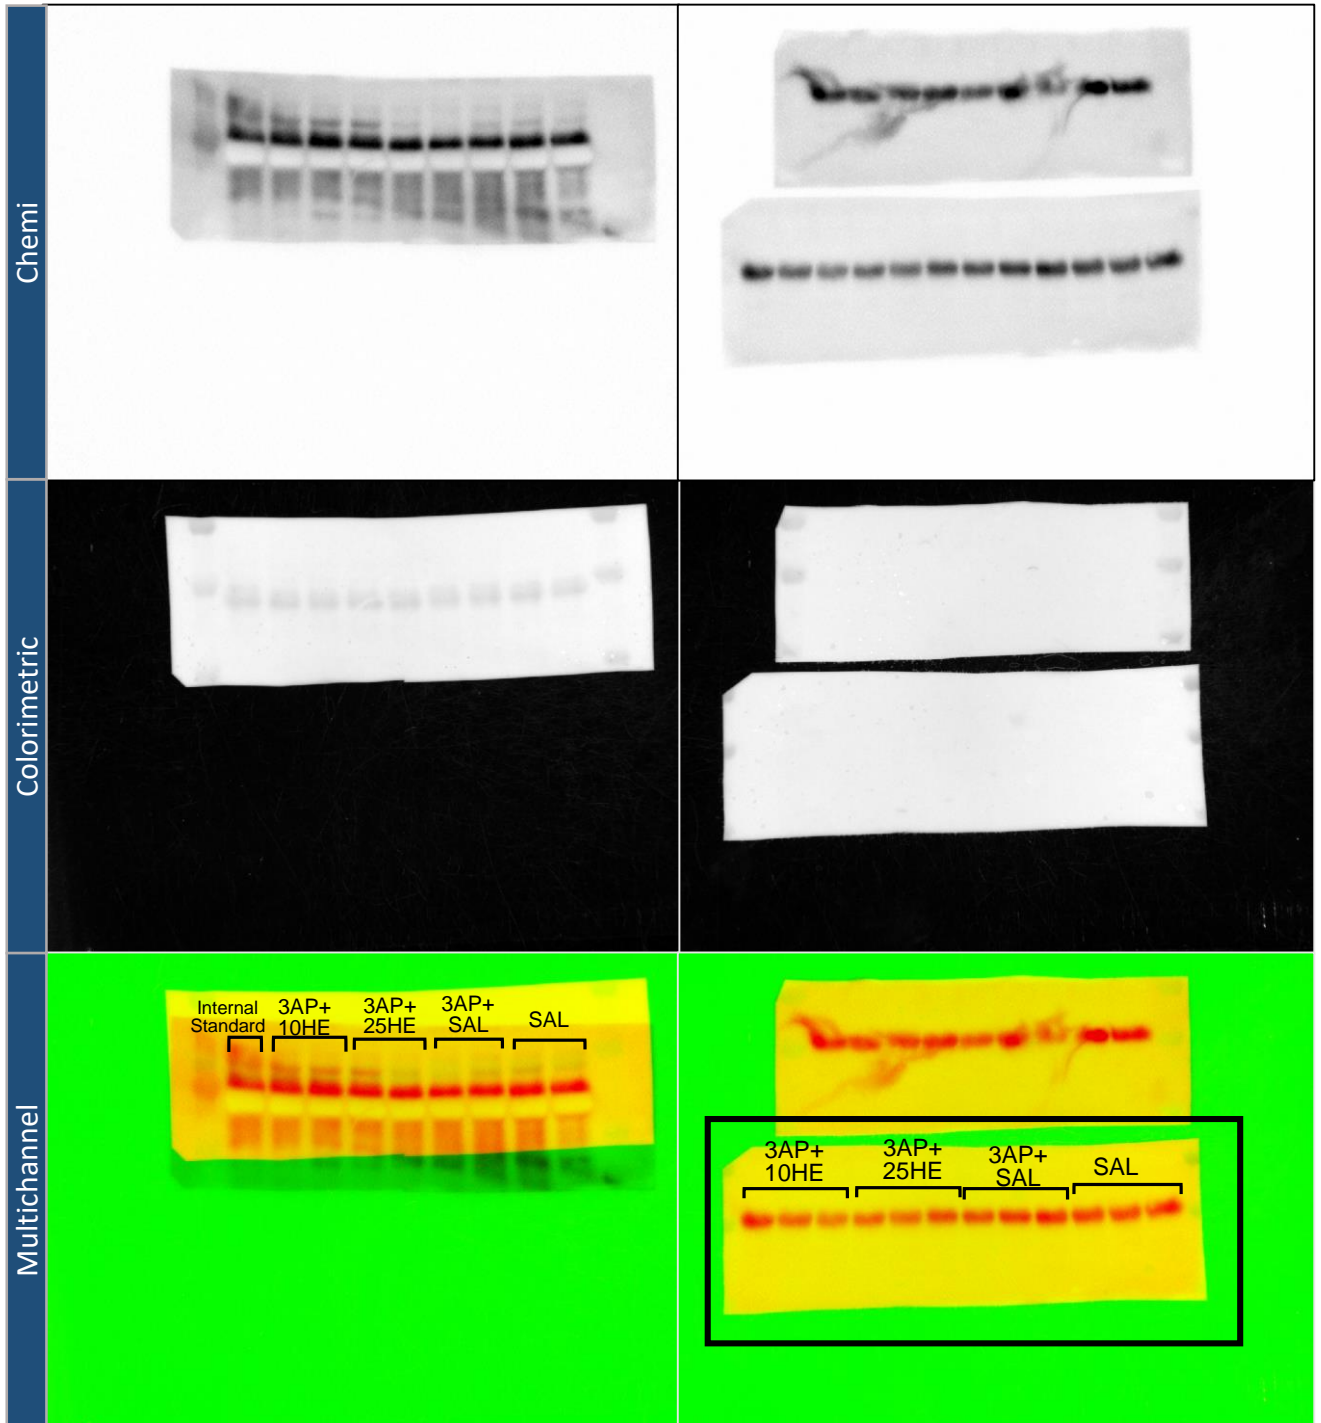

**Figure S9:** Western blot analysis of SYP. The left blot is used as a representative figure in the manuscript without including the internal standard. The left membrane was moved while imaging for colorimetric image, thus the image of multichannel was not merge perfectly.

***Hericium erinaceus* potentially rescues behavioural motor deficits through ERK-CREB-PSD95 neuroprotective mechanisms in rat model of 3-acetylpyridine-induced cerebellar ataxia**

<sup>1</sup>Pit Shan CHONG, <sup>1</sup># Sharafuddin KHAIRUDDIN, <sup>1</sup>Anna Chung Kwan TSE, <sup>1</sup>Lih Fhung HIEW, <sup>1</sup>Chun Lok LAU, <sup>1</sup>George Lim TIPOE, <sup>1</sup>Man-Lung FUNG, <sup>1,2</sup>Kah Hui WONG, <sup>1</sup>Lee Wei LIM

**Supplementary information**

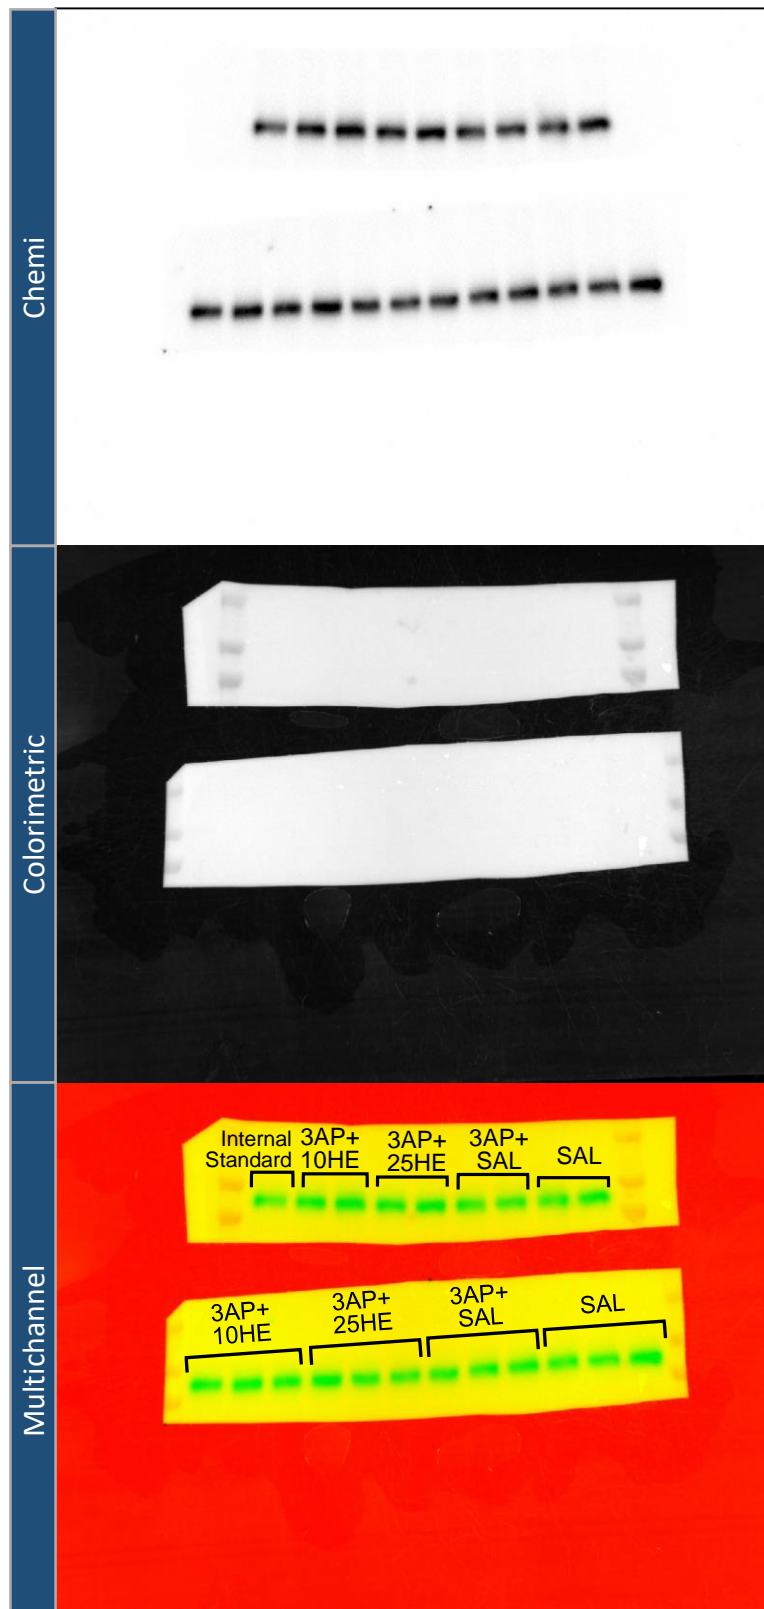

**Figure S10:** Western blot analysis of PSD-95. Four blots were exposed and captured in two image and blots for PSD-95 were labelled. The upper blot is used as a representative figure in the manuscript without including the internal standard.

***Hericium erinaceus* potentially rescues behavioural motor deficits through ERK-CREB-PSD95 neuroprotective mechanisms in rat model of 3-acetylpyridine-induced cerebellar ataxia**

<sup>1</sup>#Pit Shan CHONG, <sup>1</sup># Sharafuddin KHAIRUDDIN, <sup>1</sup> Anna Chung Kwan TSE, <sup>1</sup> Lih Fhung HIEW, <sup>1</sup> Chun Lok LAU, <sup>1</sup> George Lim TIPOE, <sup>1</sup> Man-Lung FUNG, <sup>1,2</sup> Kah Hui WONG, <sup>1</sup> Lee Wei LIM

**Supplementary information**

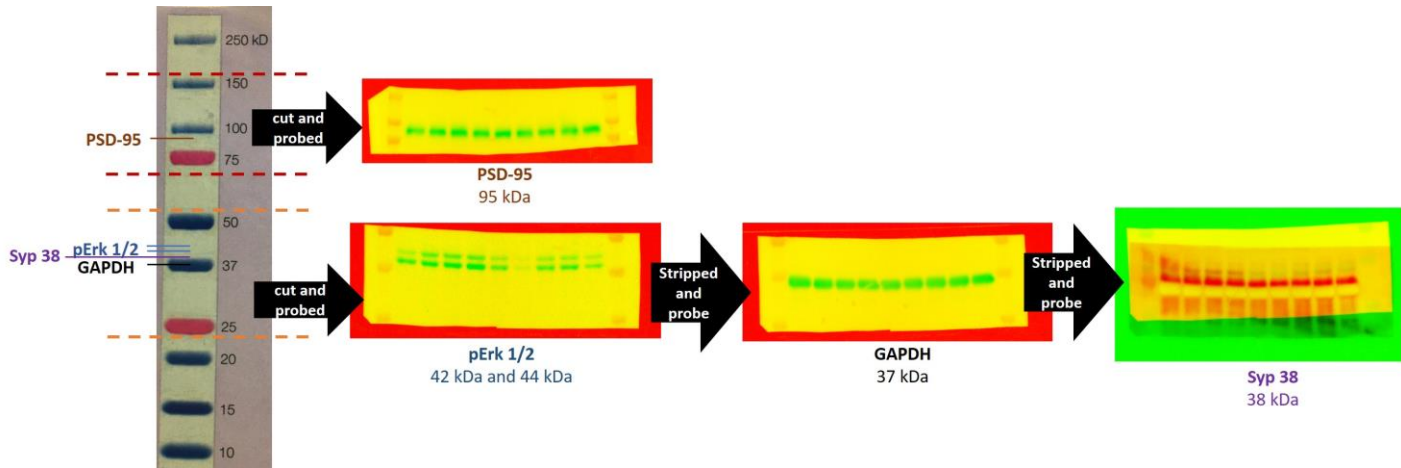

**Figure S11: Schematic diagram of the probing process of blot for PSD95, pERK1/2, SYP (Gel 1) and GAPDH.** PSD95, pERK1/2, SYP (Gel 1) and GAPDH were probed from the same blot with the same samples. The membrane was cut for detecting PSD95 and pERK1/2 separately. pERK1/2 were then stripped and probed with GAPDH. SYP (Gel 1) were further probed after stripping the GAPDH.
